# Supplementary material
Source: PubMed Central journal article supplement (PMC11220724)
Supplement: NIHMS1993190-supplement-10.pdf [file NIHMS1993190-supplement-10.pdf]

**Supplemental Table 2. Response after Six Cycles According to Age.**

| <b>Response<sup>1</sup></b>                                         | <b>Age ≤ 60 years</b> | <b>Age &gt; 60</b> |
|---------------------------------------------------------------------|-----------------------|--------------------|
| <b>Overall response, n (%)</b>                                      |                       |                    |
| CR/PR                                                               | 14 (74)               | 13 (65)            |
| SD                                                                  | 0 (0)                 | 0                  |
| POD                                                                 | 3 (16)                | 2 (10)             |
| Discontinued for toxicity<br>(prior to completion of six<br>cycles) | 2 (11)                | 5 (25)             |
| <b>Objective response rate, n (%)</b>                               | <b>14 (74)</b>        | <b>20 (68)</b>     |

<sup>1</sup>Responses to induction are shown for patients evaluable for efficacy who completed six cycles of induction therapy.

**Supplemental Table 3. Safety.**

| Adverse Events                | All grade, n (%) | Grade 3/4, n (%) |
|-------------------------------|------------------|------------------|
| <b>Hematologic events</b>     |                  |                  |
| Neutropenia                   | 28 (70)          | 27 (68)          |
| Leukopenia                    | 27 (68)          | 25 (63)          |
| Anemia                        | 23 (58)          | 17 (43)          |
| Thrombocytopenia              | 21 (53)          | 17 (43)          |
| Lymphopenia                   | 20 (50)          | 18 (45)          |
| Febrile neutropenia           | 15 (38)          | 15 (38)          |
| <b>Non-hematologic events</b> |                  |                  |
| Fatigue                       | 33 (83)          | 1 (3)            |
| Alopecia                      | 24 (60)          | 0 (0)            |
| Nausea                        | 18 (45)          | 1 (3)            |
| Diarrhea                      | 17 (43)          | 3 (8)            |
| Peripheral sensory neuropathy | 14 (35)          | 2 (5)            |
| Constipation                  | 13 (33)          | 0 (0)            |
| Anorexia                      | 11 (28)          | 1 (3)            |
| Dizziness                     | 11 (28)          | 0 (0)            |
| Vomiting                      | 11 (28)          | 1 (3)            |
| Mucositis                     | 10 (25)          | 1 (3)            |
| Cough                         | 9 (23)           | 0 (0)            |
| Fever                         | 9 (23)           | 0 (0)            |
| Rash, maculopapular           | 9 (23)           | 1 (3)            |
| Abdominal pain                | 8 (20)           | 0 (0)            |
| Hypotension                   | 8 (20)           | 1 (3)            |
| Anxiety                       | 6 (15)           | 1 (3)            |
| Back pain                     | 6 (15)           | 1 (3)            |
| Dyspnea                       | 6 (15)           | 1 (3)            |
| Headache                      | 6 (15)           | 0 (0)            |
| Pain                          | 6 (15)           | 0 (0)            |

All causality adverse events occurring in  $\geq$  15% of patients
